# Supplementary material for: A D-Alanine auxotrophic live vaccine is effective against lethal infection caused by Staphylococcus aureus
Source: PubMed Central journal article supplement (PMC5955480; doi:10.1080/21505594.2017.1417723), 2018-02-27
Supplement: kvir-09-01-1417723-s001.pdf [file kvir-09-01-1417723-s001.pdf]

## 1 TEXT S1. SUPPLEMENTAL MATERIALS AND METHODS

### 3 Bacterial strains, plasmids and growth conditions

4 The bacterial strains and plasmids used are listed in Table S1. *Staphylococcus aureus* strains  
5 were cultured in Tryptic Soy Broth No. 2 (TSB from Sigma-Aldrich Co. LLC) or in B2  
6 broth,<sup>1</sup> at 37°C with shaking at 180-210 rpm, unless otherwise stated. *S. aureus* 132 is a  
7 biofilm-forming MRSA strain isolated at the Clínica Universitaria de Navarra (Pamplona,  
8 Spain) by Vergara-Irigaray and others.<sup>2</sup> *Escherichia coli* strains were grown in Luria-Bertani  
9 (LB) media with aeration at 37°C. For plasmid selection, ampicillin and erythromycin were  
10 added at a concentration of 100 and 10 µg/mL, respectively. X-Gal (5-bromo-4chloro-3-  
11 indolyl-β-D-galactopyranoside) was used at a concentration of 150 µg/mL. D-alanine, when  
12 needed, was added to TSB or TSA at a concentration of 5 mM, unless otherwise noted.

### 14 DNA manipulation

15 Genomic DNA from *S. aureus* was isolated after lysis with lysostaphin (0.1 mg/mL), using  
16 the Wizard Genomic DNA Purification Kit (Promega Biotech Ibérica, S.L.) according to the  
17 manufacturer's protocol. Plasmid DNA from *E. coli* was extracted using the High Pure  
18 Plasmid Isolation Kit (Roche Diagnostics, S.L.).

19 Restrictions enzymes, GoTaq DNA polymerase, TSAP Thermosensitive Alkaline  
20 Phosphatase and T4 DNA Ligase were purchased from Promega Biotech Ibérica, S.L.  
21 and used as recommended by the supplier. Oligonucleotides and REDAccuTaq LA DNA  
22 Polymerase were obtained from Sigma-Aldrich Co. LLC. Primers and probes used are listed  
23 in Table S2.

24 The genome of *S. aureus* 132 was previously sequenced and assembled into 44 large  
25 contigs by Vergara-Irigaray and others (GenBank accession number ACOT01000000)<sup>2</sup>. We  
26 identified putative alanine racemase genes from *S. aureus* 132 by using the nucleotide  
27 sequences of *alr1* and *alr2* (*dadX*) genes from *S. aureus* subsp. *aureus* COL (GenBank  
28 accession number NC\_002951),<sup>3</sup> and *S. aureus* subsp. *aureus* NCTC 8325 (GenBank  
29 accession number NC\_007795),<sup>4</sup> in the Clone Manager Suite 9 (Sci-Ed Software) and the

30 tBLASTx (<http://www.ncbi.nlm.nih.gov>) programs to probe the assembled contigs of *S.*  
31 *aureus* 132. An analysis of amino acid sequence homology between the putative alanine  
32 racemase proteins encoded by *S. aureus* 132 and other known alanine racemases from Gram-  
33 positive bacteria was performed using ClustalW.

34

### 35 **Electroporation procedure**

36 The recombinant plasmids were introduced by electroporation into *E. coli* DC10 $\beta$ ,<sup>5</sup> according  
37 to the Gene Pulser Xcell Electroporation System instructions (Bio-Rad Laboratories, Inc.)  
38 using the following settings: 200  $\Omega$ , 18 kV/cm, 25  $\mu$ F. The *E. coli* DC10 $\beta$  strain is a DNA  
39 cytosine methyltransferase mutant of the high-efficiency *E. coli* strain DH10B, and was used  
40 as a universal staphylococcal cloning host.<sup>5</sup> Electrocompetent *S. aureus* cells were prepared  
41 as described by Monk *et al.*<sup>5</sup> or according a protocol described for *Staphylococcus carnosus*  
42 using SMMP medium for recovery of transformed *S. aureus* cells after electroporation.<sup>6</sup>  
43 Plasmid DNA (2.5-6  $\mu$ g) was added to electrocompetent cells (50  $\mu$ L) at room temperature.  
44 Electroporation was then performed using a Gene Pulser Xcell electroporator (Bio-Rad  
45 Laboratories, Inc.) with the following settings: 100  $\Omega$ , 21 kV/cm, 25  $\mu$ F or using the  
46 Nucleofector II device (Amaxa Biosystems, Inc.) with a specialized program for bacterial  
47 transformation. Immediately after the electric pulse, the cells were incubated in 0.8 mL of  
48 TSB supplemented with 0.5 M of sucrose or 1 mL of SMMP at 28°C for 1-2 h, before plating  
49 on selective medium.

50

### 51 **Construction of alanine racemase deficient mutants of *S. aureus***

52 To generate unmarked and stable in-frame deletions of the *alr1* and/or *alr2* genes of *S.*  
53 *aureus* 132  $\Delta$ *dat*, we used an allelic exchange system between the chromosomal genes and  
54 the temperature-sensitive shuttle plasmid pMAD as previously described.<sup>7, 8</sup> First, the  
55 contiguous upstream and downstream flanking regions (approximately 1,000 bp) of the *alr1*  
56 and *alr2* genes were amplified from the *S. aureus* 132 chromosome by PCR and were cloned  
57 into MluI-BglII digested pMAD. The recombinant plasmids, containing the  $\Delta$ *alr1* or  $\Delta$ *alr2*  
58 mutant alleles, were introduced into *E. coli* DC10 $\beta$  strain as an intermediate host for the

59 transfer of plasmid DNA into *S. aureus* 132  $\Delta dat$ . Then, stable *alr* mutants were constructed  
60 by two successive crossover events as previously described.<sup>7, 8</sup> Resolved mutants were tested  
61 for growth on TSA in the presence or absence of D-alanine to identify auxotrophic strains.  
62 The gene deletions were confirmed by PCR using specific primers (see Table S2) and  
63 sequence analysis (Macrogen Europe, Amsterdam, The Netherlands).

64

### 65 **Real-time RT-PCR**

66 The absence of expression of *alr1* and *alr2* genes of the *S. aureus* deletion mutants was  
67 confirmed by RT-PCR using the Universal Probe Library (UPL) TaqMan probes (Roche,  
68 Germany) and gene specific primers (see Table S2). Total RNA was extracted from log-phase  
69 cultures ( $OD_{600} = 0.5$  to  $0.6$ ) using the High Pure RNA Isolation Kit (Hoffman-La Roche  
70 Ltd.) according to the manufacturer's protocol. The concentration of RNA was determined by  
71 measuring the absorbance at 260 nm ( $A_{260}$ ) in a NanoDrop ND-1000 spectrophotometer. The  
72 purity of the RNA was determined using the  $A_{260}/A_{280}$  ratio, where a value close to 2.1 was  
73 considered pure. Next, 100 ng of RNA was reverse transcribed into single-stranded cDNA.  
74 Real-time PCR amplification was carried out with a LightCycler® 480 RNA Master  
75 Hydrolysis Probes kit in a LightCycler 480 instrument (Roche Diagnostics, S.L., Germany)  
76 with an initial incubation of 65°C for 3 min, a denaturation step at 95°C for 30 s, followed by  
77 45 cycles of target amplification consisting of 15 s at 95°C and 60°C for 45 s, and a final  
78 elongation step of 30 s at 40°C. In all cases, the expression levels of the genes of interest  
79 were normalized relative to the transcription levels of the housekeeping gene *gyrB*. All RNA  
80 extractions and RT-PCR assays were performed in duplicate in two independent experiments.

81

### 82 **Determination of D-alanine requirement for growth of *S. aureus* 132 $\Delta dat \Delta alr1 \Delta alr2$**

83 Overnight cultures from *S. aureus* 132 and the isogenic 132  $\Delta dat \Delta alr1 \Delta alr2$  derivative  
84 were diluted into TSB supplemented with 10 mM D-alanine and incubated at 37°C under  
85 agitation until an optical density at 600 nm ( $OD_{600}$ ) of 0.25 was achieved. Bacteria from log-  
86 phase cultures were collected by centrifugation, washed and resuspended in TSB, and then  
87 inoculated onto TSA supplemented with different concentrations of D-alanine (0.005 to 10

88 mM). Plates were incubated at 37°C for 24 h and growth was observed.

89

### 90 **Evaluation of phenotypic stability**

91 Overnight cultures from *S. aureus* 132  $\Delta dat$   $\Delta alr1$   $\Delta alr2$  were diluted at an initial OD<sub>600</sub> of  
92 0.02 into TSB supplemented with 5 mM D-alanine and incubated at 37°C under agitation for  
93 up to 11 days. Aliquots were removed at different days and the cell viability was evaluated by  
94 plating cells onto TSA in the presence or absence of 5 mM D-alanine. All experiments were  
95 performed in triplicate.

96

### 97 **Electron Microscopy**

98 Samples for electron microscopy were prepared as previously described <sup>7</sup>. Briefly, bacteria  
99 for transmission electron microscopy (TEM) samples were grown at 37°C in TSA containing  
100 10 mM D-alanine. Discrete colonies were spread on Mueller-Hinton agar using a swab, and  
101 incubated overnight at 37°C. Cells were then harvested by centrifugation, washed in 0.2 M  
102 sodium cacodylate buffer, pH 7.4 and prefixed in 2.5% (w/v) glutaraldehyde for 4 h at room  
103 temperature and fixed with 1% (w/v) osmium acetate in 0.2 M sodium cacodylate buffer, pH  
104 7.4. After washing with cacodylate buffer and dehydration with acetone, cells were  
105 embedded in SPURR (Spurr's Epoxy Embedding Medium). Ultrathin sections (70 nm) of  
106 these samples were stained with 4% (w/v) uranyl acetate and then with 0.4% (w/v) lead  
107 citrate, and examined with a JEOL JEM transmission electron microscope at 80 kV.

108 For scanning electron microscopy (SEM), bacterial strains were grown overnight at 37°C  
109 in TSB containing 10 mM D-alanine. After incubation, bacterial cultures were centrifuged  
110 and the pellets were washed twice with 0.9% NaCl and resuspended in TSB. These samples  
111 were inoculated at an initial OD<sub>600</sub> of 0.02 into TSB supplemented with different  
112 concentrations of D-alanine (0.01, 0.1, 1 and 10 mM) and cultures were incubated at 37°C  
113 under agitation for 3 h. Cells were then harvested by centrifugation, washed twice in 0.1 M  
114 PBS, pH 7.4, fixed in 4% paraformaldehyde for 30 min at room temperature and washed  
115 again twice in 0.1 M PBS, pH 7.4. Each sample was dehydrated in an ethanol series and then  
116 dried to the critical point with CO<sub>2</sub> (Bal-Tec CPD 030). One drop of each sample was placed

117 onto a slide cover and fixed in aluminium supports for gold coating (Bal-Tec SCD 004  
118 sputter coater). All specimens were examined with a Jeol JSM-6400 electron microscope.  
119 Samples were observed under  $\times 2,500$ ,  $\times 5,000$ ,  $\times 10,000$  and  $\times 20,000$  magnification.

120

### 121 **Desiccation tolerance assay**

122 To compare the sensitivity of *S. aureus* 132 and 132  $\Delta dat \Delta alr1 \Delta alr2$  strains to desiccation  
123 stress, culture samples at log-phase growth ( $OD_{600} = 0.6$ ) were washed and serially diluted in  
124 TSB. Drops of 5  $\mu\text{L}$  were spotted onto sterile 0.45  $\mu\text{m}$  mixed cellulose esters membrane  
125 filters and maintained at room temperature. At various time points, the filters were placed  
126 onto TSB agar plates containing 5 mM D-alanine and incubated at 37°C for 18 h. The  
127 desiccation resistance of the cells was determined by comparing the viability of spots before  
128 and after stressful conditions between the wild type and the mutant strain. All cultures were  
129 performed in triplicate.

130

### 131 **Animals**

132 Animals were bred and maintained under specific pathogen-free conditions in the facility at  
133 the Centro Tecnológico de Formación de la Xerencia de Xestión Integrada A Coruña (CTF-  
134 XXIAC), Servicio Galego de Saúde, with free access to food and water. Female BALB/c  
135 mice at 6 to 8 weeks of age were used for active immunizations and at 9-weeks old for  
136 passive immunization experiments. Male BALB/c mice aged 6-weeks were used for  
137 estimation of cytokine levels produced in mouse spleen homogenates. All mice were  
138 anesthetized with 5% sevoflurane in oxygen. After infection, mice were monitored daily for  
139 signs of clinical illness (piloerection, hunched posture, decreased mobility, rolling/twisting  
140 movements and weight loss) over a period of 14 days. Mice were euthanized with an  
141 overdose of thiopental sodium and cervical dislocation at the end of experiments or when  
142 animals exhibited a greater than 20% body weight loss or severe signs of rolling/twisting  
143 movements.

144

### 145 **Bacterial clearance from blood**

146 To investigate bacterial clearance from the blood of mice i.v. inoculated, an equivalent dose  
147 of the parental 132 strain and the isogenic 132  $\Delta dat \Delta alr1 \Delta alr2$  derivative were  
148 independently prepared in saline as above. BALB/c mice ( $n = 4/\text{group}$ ) were then injected  
149 with  $2-3 \times 10^7$  CFU (100  $\mu\text{L}$ ) of the bacterial suspension i.v. via the lateral tail vein. At  
150 different times, blood samples were collected from the submandibular vein of mice and the  
151 number of CFU was determined by plating serial dilution on TSA (parental strain) or TSA  
152 plates supplemented with 5 mM D-alanine (mutant strain). For i.p. administration, bacteria  
153 were suspended in saline solution containing 3% mucin from porcine stomach and BALB/c  
154 mice ( $n = 4/\text{group}$ ) were injected with  $2-3 \times 10^7$  CFU (250  $\mu\text{L}$ ) of the bacterial suspension via  
155 i.p. route.

156

### 157 **Bacterial dissemination to internal organs**

158 In order to determine bacterial dissemination to internal organs, BALB/c mice ( $n = 7-$   
159  $9/\text{group}$ ) were injected with 100  $\mu\text{L}$  of the bacterial suspension i.v. via the lateral tail vein ( $6$   
160  $\times 10^6$  CFU of *S. aureus* 132 or  $1.9 \times 10^7$  CFU of 132  $\Delta dat \Delta alr1 \Delta alr2$  derivative). At 28  
161 days post-infection, the mice were euthanized and bacterial loads in different organs (kidney,  
162 spleen, lung and liver) were determined. The organs were extracted aseptically, weighed and  
163 homogenized in sterile NaCl 0.9% using a Retsch MM200 mixer mill. The homogenates  
164 were serially diluted and plated on TSA (parental strain) or TSA plates supplemented with 5  
165 mM D-alanine (mutant strain) to determine CFU counts. The number of CFU detected in the  
166 organs was standardized per 1 g wet organ weight. For i.p. administration, bacteria were  
167 suspended in saline solution containing 3% mucin from porcine stomach and BALB/c mice  
168 ( $n = 5-7/\text{group}$ ) were injected with 250  $\mu\text{L}$  of the parental 132 strain ( $2 \times 10^7$  CFU) or the  
169 isogenic 132  $\Delta dat \Delta alr1 \Delta alr2$  derivative ( $4 \times 10^7$  CFU) via i.p. route. Similarly, at 28 days  
170 post-infection, bacterial loads in kidney, spleen, lung, liver and heart were determined as  
171  $\text{Log}_{10}$  CFU per gram of organ.

172

### 173 **Detection of IgG and IgM antibodies by ELISA**

174 The levels of staphylococcus-specific immunoglobulin G (total IgG), as well as IgG

175 subclasses (IgG1, IgG2a, IgG2b and IgG3) and IgM were quantitatively determined in  
176 mouse sera with a whole-bacterial cell Enzyme-linked Immunosorbent Assay (ELISA) in  
177 accordance with the previously described protocol.<sup>7</sup> In this assay, *S. aureus* strains were  
178 grown in TSB until an OD<sub>600</sub> of 1, diluted 1:10 in 100 mM carbonate-bicarbonate buffer, pH  
179 9.6, and bacterial cells were fixed to the bottom of ELISA plates (Greiner Bio-one #655061;  
180 96-wells, polystyrene, F-bottom) by overnight incubation at 4°C. For the detection of specific  
181 antibodies against *S. aureus* 132, a protein A-deficient strain (132  $\Delta spa$ ) was used to avoid  
182 the nonimmune binding of the Fc region of IgGs to protein A.<sup>2,9</sup> After coating, plates were  
183 washed five times with phosphate buffered saline (PBS) and blocked with 5% skim milk in  
184 PBS for 2 h at room temperature. For other staphylococcal strains, an additional blocking  
185 step with rabbit serum (dilution 1:1,000 in PBS) for 1 h at 37°C was included to reduce  
186 background by blocking non-specific interactions of the primary antibody and protein A.  
187 Then, the wells were aspirated and washed five times with PBS containing 0.005% Tween-20  
188 (PBS-T). Two-fold serial dilutions of mouse sera in DMEM supplemented with 10% fetal  
189 calf serum (FCS from Gibco) were added to wells, and incubated overnight at 4°C. The plates  
190 were again washed with PBS-T and 100  $\mu$ L of horseradish peroxidase (HRP)-conjugated  
191 anti-mouse secondary antibodies (anti-mouse IgG, IgG1, IgG2a, IgG2b, IgG3 or IgM, HRP  
192 conjugates produced in rabbit from Sigma-Aldrich) at a dilution of 1:5,000 in DMEM  
193 supplemented with 10% FCS was added to each well. After another hour of incubation at  
194 room temperature in the dark, the plates were washed five times with PBS-T and 100  $\mu$ L of  
195 3,3',5,5'-Tetramethylbenzidine (TMB; Sigma-Aldrich) was added to each well. After 2 min,  
196 the colour reaction was stopped by adding 50  $\mu$ L of 1N H<sub>2</sub>SO<sub>4</sub> per well. The absorbance was  
197 read at 450 nm with a modular microplate reader (Infinite M200 NanoQuant from Tecan  
198 Group Ltd.). The endpoint titers for each antibody were defined as the maximum dilution of  
199 serum with an absorbance 0.1 point higher than of the sera blank wells.

200

#### 201 **Detection of cytokines by ELISA**

202 Interferon-gamma (IFN- $\gamma$ ), interleukin (IL)-2, IL-4 and IL-17A were measured in the cellular  
203 supernatant of splenocytes isolated from vaccinated and control mice on day 54 after the

204 second immunization. The cytokine levels were quantified by ELISA with the Mouse  
205 Th1/Th2 ELISA Ready-SET-Go! and the Mouse IL-17A (homodimer) ELISA Ready-SET-  
206 Go! (Affymetrix, eBioscience, Ltd.) kits according to the manufacturer's instructions.  
207 BALB/c male mice ( $n = 7$ /group) were sacrificed under proper anesthesia and mice spleens  
208 were removed aseptically, mechanically disrupted and washed in saline by centrifugation at  
209  $400 \times g$  for 10 min at room temperature. The cell suspension was enriched for lymphocytes  
210 using a Histopaque density gradient (Sigma-Aldrich). The cells were suspended in RPMI-  
211 1640 medium containing 10% FCS and dispensed into 24-well plates (Costar 3524, flat  
212 bottom with lid, polystyrene, sterile) at a concentration of  $5 \times 10^6$  splenocytes per well.  
213 Splenocytes were then ex-vivo restimulated with the vaccine strain ( $5 \times 10^7$  CFU per well)  
214 and incubated at 37°C, 5% CO<sub>2</sub> for 48 h. As positive control, mouse splenocytes were  
215 cultured with 1X Cell Stimulation Cocktail (Affymetrix, eBioscience, Ltd.) at 37°C, 5% CO<sub>2</sub>.  
216 This cocktail contains phorbol 12-myristate 13-acetate and ionomycin to induce cytokine  
217 production in cell cultures. Supernatants from cell cultures were collected after 48 h, and  
218 cytokines were detected by a sandwich ELISA protocol. Briefly, the 96-well ELISA plates  
219 (Costar 9018 or Nunc Maxisorp) were coated with the capture antibodies (anti-mouse IFN- $\gamma$ ,  
220 IL-2, IL-4 and IL-17A) overnight at 4°C. The ELISA plates were then washed five times with  
221 wash buffer (1 $\times$  PBS, 0.05% Tween-20, pH 7.4) and incubated with 1 $\times$  ELISA Diluent (PBS  
222 supplemented with 10% FCS) at room temperature for 1 h. Next, 100  $\mu$ L of the culture  
223 supernatants from restimulated splenocytes was added to each well followed by incubation  
224 overnight at 4°C for maximum sensitivity. A relative standard curve was created using a  
225 serial dilution of each recombinant mouse cytokine protein. Next day, the wells were  
226 aspirated and washed five times with wash buffer. Then, 100  $\mu$ l of biotin-conjugated anti-  
227 mouse cytokine (IFN- $\gamma$ , IL-2, IL-4 and IL-17A) antibody was added to each well and the  
228 plates were incubated at room temperature for 1 h. After washing, 100  $\mu$ L of avidin-HRP  
229 conjugate solution was added and the plates were incubated at room temperature for 30 min.  
230 After washing, 100  $\mu$ L of TMB substrate was added and the plates were incubated at room  
231 temperature for 15 min. To stop the color reaction, 50  $\mu$ L of 1 N H<sub>2</sub>SO<sub>4</sub> was added to each  
232 well. Absorbance was read at 450 nm and 570 nm. The background absorbance from the



233 microplate was corrected for by subtracting values of 570 nm (reference) from those of 450  
234 nm. The IFN- $\gamma$ , IL-2, IL-4 and IL-17A cytokine levels in the culture supernatants were  
235 estimated by interpolation from the standard curve and were expressed as pg/mL.

236

237

## 238 **TEXT SI REFERENCES**

239 1. Schenk S, Laddaga RA. Improved method for electroporation of *Staphylococcus*  
240 *aureus*. FEMS Microbiol Lett 1992; 73:133-8.

241 2. Vergara-Irigaray M, Valle J, Merino N, Latasa C, Garcia B, Ruiz de Los Mozos I, et  
242 al. Relevant role of fibronectin-binding proteins in *Staphylococcus aureus* biofilm-associated  
243 foreign-body infections. Infect Immun 2009; 77:3978-91.

244 3. Gill SR, Fouts DE, Archer GL, Mongodin EF, Deboy RT, Ravel J, et al. Insights on  
245 evolution of virulence and resistance from the complete genome analysis of an early  
246 methicillin-resistant *Staphylococcus aureus* strain and a biofilm-producing methicillin-  
247 resistant *Staphylococcus epidermidis* strain. J Bacteriol 2005; 187:2426-38.

248 4. Gillaspay AF, Worrell V, Orvis J, Roe BA, Dyer DW, Iandolo JJ. The *Staphylococcus*  
249 *aureus* NCT8325 genome. In: Fischetti V, Novick R, Ferretti J, Portnoy D, Rood J, eds.  
250 Gram-positive pathogens: ASM Press, 2006.

251 5. Monk IR, Shah IM, Xu M, Tan MW, Foster TJ. Transforming the untransformable:  
252 application of direct transformation to manipulate genetically *Staphylococcus aureus* and  
253 *Staphylococcus epidermidis*. MBio 2012; 3.

254 6. Lofblom J, Kronqvist N, Uhlen M, Stahl S, Wernerus H. Optimization of  
255 electroporation-mediated transformation: *Staphylococcus carnosus* as model organism. J  
256 Appl Microbiol 2007; 102:736-47.

257 7. Cabral MP, García P, Beceiro A, Rumbo C, Pérez A, Moscoso M, et al. Design of live  
258 attenuated bacterial vaccines based on D-glutamate auxotrophy. Nat Comms 2017.  
259 doi:10.1038/NCOMMS15480.

260 8. Arnaud M, Chastanet A, Debarbouille M. New vector for efficient allelic replacement  
261 in naturally nontransformable, low-GC-content, gram-positive bacteria. Appl Environ  
262 Microbiol 2004; 70:6887-91.

263 9. Merino N, Toledo-Arana A, Vergara-Irigaray M, Valle J, Solano C, Calvo E, et al.  
264 Protein A-mediated multicellular behavior in *Staphylococcus aureus*. J Bacteriol 2009;  
265 191:832-43.

266

**Table S1.** Strains and plasmids used in this study.

| Strain or plasmid                        | Relevant features                                                                                                                                                                                                                | Reference  |
|------------------------------------------|----------------------------------------------------------------------------------------------------------------------------------------------------------------------------------------------------------------------------------|------------|
| <b><i>S. aureus</i> strains</b>          |                                                                                                                                                                                                                                  |            |
| <i>S. aureus</i> 132                     | MRSA clinical isolate                                                                                                                                                                                                            | 1          |
| 132 $\Delta dat$                         | 132 derivative, $\Delta dat$                                                                                                                                                                                                     | 2          |
| 132 $\Delta dat \Delta alr1$             | 132 derivative, $\Delta dat \Delta alr1$                                                                                                                                                                                         | This study |
| 132 $\Delta dat \Delta alr2$             | 132 derivative, $\Delta dat \Delta alr2$                                                                                                                                                                                         | This study |
| 132 $\Delta dat \Delta alr1 \Delta alr2$ | 132 derivative, $\Delta dat \Delta alr1 \Delta alr2$                                                                                                                                                                             | This study |
| 132 $\Delta spa$                         | 132 derivative, $\Delta spa$ protein A-deficient                                                                                                                                                                                 | 1          |
| FPR3757 (USA300 LAC)                     | USA300 epidemic clone                                                                                                                                                                                                            | 3          |
| RF122                                    | ST151 and CC151 strain from bulk milk                                                                                                                                                                                            | 4          |
| ED133 (formerly 1174)                    | ST133 and CC133 strain from ovine mastitis                                                                                                                                                                                       | 5          |
| ED98                                     | ST5 and CC5 strain from broiler chicken (skeletal infection)                                                                                                                                                                     | 6          |
| <b><i>E. coli</i> strains</b>            |                                                                                                                                                                                                                                  |            |
| <i>E. coli</i> TG1                       | <i>supE thi-1</i> $\Delta(lac-proAB)$ $\Delta(mcrB-hsdSM)5$ , $(r_K^- m_K^-)[F' traD36 proAB lacI^q \Delta M15]$                                                                                                                 | 7          |
| <i>E. coli</i> DC10 $\beta$              | $\Delta dcm$ in the DH10B background<br>[F- <i>mcrA</i> $\Delta(mrr-hsdRMS-mcrBC)$<br>$\Phi 80dlacZ\Delta M15 \Delta lacX74 endA1 recA1$<br><i>deoR</i> $\Delta(ara,leu)7697 araD139 galU galK$<br><i>nupG rpsL</i> $\lambda$ -] | 8          |
| <b>Plasmids</b>                          |                                                                                                                                                                                                                                  |            |
| pMAD                                     | A temperature-sensitive <i>E. coli/S. aureus</i> shuttle vector. Amp <sup>R</sup> ; Ery <sup>R</sup> , <i>bgaB</i> <sup>+</sup>                                                                                                  | 9          |
| pMAD- $\Delta alr1$                      | pMAD derivative, source of $\Delta alr1$                                                                                                                                                                                         | This study |
| pMAD- $\Delta alr2$                      | pMAD derivative, source of $\Delta alr2$                                                                                                                                                                                         | This study |

## Table S1 References

1. Vergara-Irigaray M, Valle J, Merino N, Latasa C, Garcia B, Ruiz de Los Mozos I, et al. Relevant role of fibronectin-binding proteins in *Staphylococcus aureus* biofilm-associated foreign-body infections. *Infect Immun* 2009; 77:3978-91.
2. Cabral MP, García P, Beceiro A, Rumbo C, Pérez A, Moscoso M, et al. Design of live attenuated bacterial vaccines based on D-glutamate auxotrophy. *Nat Comms* 2017. doi:10.1038/NCOMMS15480.
3. Diep BA, Gill SR, Chang RF, Phan TH, Chen JH, Davidson MG, et al. Complete genome sequence of USA300, an epidemic clone of community-acquired methicillin-resistant *Staphylococcus aureus*. *Lancet* 2006; 367:731-9.
4. Fitzgerald JR, Monday SR, Foster TJ, Bohach GA, Hartigan PJ, Meaney WJ, et al. Characterization of a putative pathogenicity island from bovine *Staphylococcus aureus* encoding multiple superantigens. *J Bacteriol* 2001; 183:63-70.
5. Ben Zakour NL, Sturdevant DE, Even S, Guinane CM, Barbey C, Alves PD, et al. Genome-wide analysis of ruminant *Staphylococcus aureus* reveals diversification of the core genome. *J Bacteriol* 2008; 190:6302-17.
6. Lowder BV, Guinane CM, Ben Zakour NL, Weinert LA, Conway-Morris A, Cartwright RA, et al. Recent human-to-poultry host jump, adaptation, and pandemic spread of *Staphylococcus aureus*. *Proc Natl Acad Sci U S A* 2009; 106:19545-50.
7. Simon R, Priefer U, Pühler A. A broad host range mobilization system for in vivo genetic engineering: transposon mutagenesis in Gram negative bacteria. *Nat Biotechnology* 1983; 1:784-91.
8. Monk IR, Shah IM, Xu M, Tan MW, Foster TJ. Transforming the untransformable: application of direct transformation to manipulate genetically *Staphylococcus aureus* and *Staphylococcus epidermidis*. *MBio* 2012; 3.
9. Arnaud M, Chastanet A, Debarbouille M. New vector for efficient allelic replacement in naturally nontransformable, low-GC-content, gram-positive bacteria. *Appl Environ Microbiol* 2004; 70:6887-91.

**Table S2.** Oligonucleotides and probes used in this study.

| <b>Primer</b>            | <b>Sequence (5'→3')<sup>a</sup></b> |
|--------------------------|-------------------------------------|
| <b>alr1UP-F(MluI)</b>    | cccacgcgtCATTACTTAAACGCAACA         |
| <b>alr1UP-R(NotI)</b>    | cccgcggccgcATTACTTCCTCCTGTAAT       |
| <b>alr1DN-F(NotI)</b>    | cccgcggccgcTATGGTCAGTGCATATAA       |
| <b>alr1DN-R(BglII)</b>   | cccagatctCTTCCACGATTAGTTG           |
| <b>alr1-F</b>            | CGAGTTGCCTTAACGGTTCC                |
| <b>alr1-R</b>            | ACAGACTCACCCGCTTG TAG               |
| <b>alr1Ext-F</b>         | GCATTAGGCACAGGCTTAGG                |
| <b>alr1Ext-R</b>         | CAATCGCATGCTTCACACTC                |
| <b>alr1UP-Fseq</b>       | TCCAGAATTTTCGAGCTATTG               |
| <b>alr1DN-Rseq</b>       | TCACTTCGTCAGTGTATTTC                |
| <b>alr2UP-F(MluI)</b>    | cccacgcgtGTCATTGCATACTTAGAA         |
| <b>alr2UP-R(NotI)</b>    | cccgcggccgcTGTATTACACCTCTTTGT       |
| <b>alr2b-DN-F (NotI)</b> | cccgcggccgcAGGAGTACATTTCAAATG       |
| <b>alr2DN-R(BglII)</b>   | cccagatctCTGCTTCTTCATTTCTAT         |
| <b>alr2-F</b>            | AGTCCGTGAACATCAAATAC                |
| <b>alr2-R</b>            | CTATAACCGCAATAATCACC                |
| <b>alr2Ext-F</b>         | GTCTATGACAAACCAACGCC                |
| <b>alr2Ext-R</b>         | CCTCAGCTACAAGTTTGACC                |
| <b>alr2UP-Fseq</b>       | CATCAACATCCTGAATTAAGC               |
| <b>alr2DN-Rseq</b>       | GATGAAGGTAATTTAGCGTC                |
| <b>datUP (MluI) F</b>    | cccacgcgtGAAACGTATTCATATGAT         |
| <b>datUP (NotI) R</b>    | cccgcggccgcATATTATTCCTCCACGC        |
| <b>datDOWN (NotI) F</b>  | cccgcggccgcAATTCCTTCATCATATTT       |
| <b>datDOWN (BglII) R</b> | cccagatctGCGAATCTAAACTCGGTA         |
| <b>DatF</b>              | TATTC AAGCAACGCGTGGTG               |
| <b>DatR</b>              | AGTTGACGTGTAATTGGGCC                |
| <b>datExtF</b>           | GTCATGGGTGACGTGACAAC                |
| <b>datExtR</b>           | GCACCACCTGCTGAATCAAG                |
| <b>datseqF</b>           | GCCGGTTGTAACAGAAGATG                |
| <b>datseqR</b>           | CAATTGCCGGGTCTGCAATC                |
| <b>gyrB#131-left</b>     | CGGTGGCGGATACAAAGT                  |
| <b>gyrB#131-right</b>    | GCGTTTACAACCTGATGAACCA              |
| <b>alr1#78-left</b>      | CAATTGTTAAAGTGCCAGATCAA             |
| <b>alr1#78-right</b>     | ACCACCTCTACCGACTGTGG                |
| <b>alr2#136-left</b>     | GGTAAACGCTACCCGATACG                |
| <b>alr2#136-right</b>    | TGTACATTGCCATCTACTTCAACA            |

<sup>a</sup>The restriction enzymes sites are underlined.

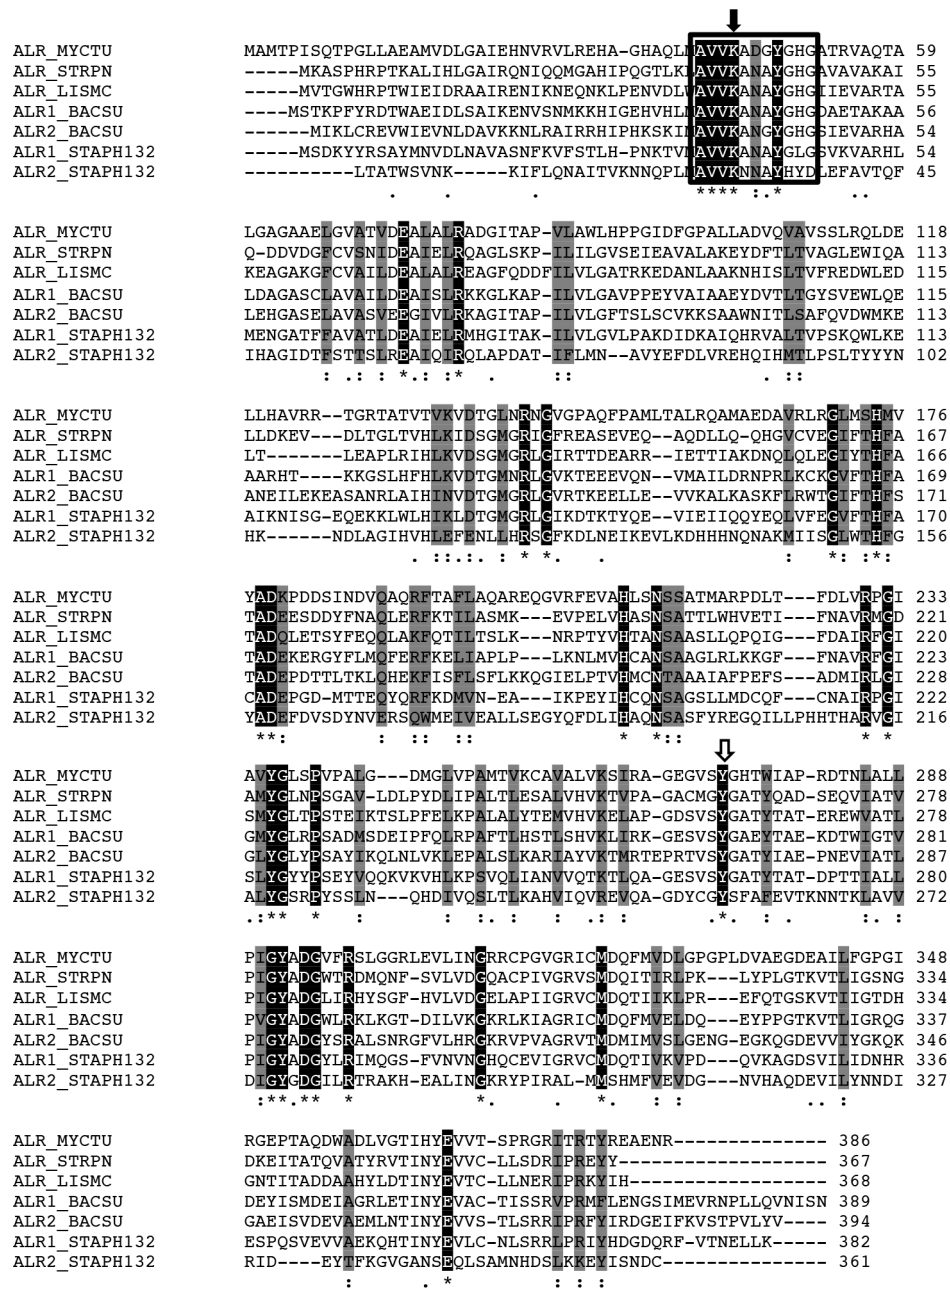

**Figure S1. Multiple alignment of amino acid sequences of alanine racemases (Alr) from *S. aureus* 132 (ALR1\_STAPH132 and ALR2\_STAPH132) and other Gram-positive bacteria.** The amino acid sequence alignment of representative Alr was generated with Clustal Omega (1.2.1). Identical residues are shown on a black background and amino acids with similar physicochemical properties are indicated by a gray background. The box encloses the conserved pyridoxal-5'-phosphate (PLP)-binding motif. The black arrow marks the highly conserved PLP-bound lysine, and the white arrow indicates the location of the catalytic tyrosine. The representative Alrs are homologs from *Mycobacterium tuberculosis* ATCC 25618 (ALR\_MYCTU), *Streptococcus pneumoniae* serotype 4 (ALR\_STRPN), *Listeria monocytogenes* serotype 4b (ALR\_LISMC) and *Bacillus subtilis* 168 (ALR1\_BACSU and ALR2\_BACSU).

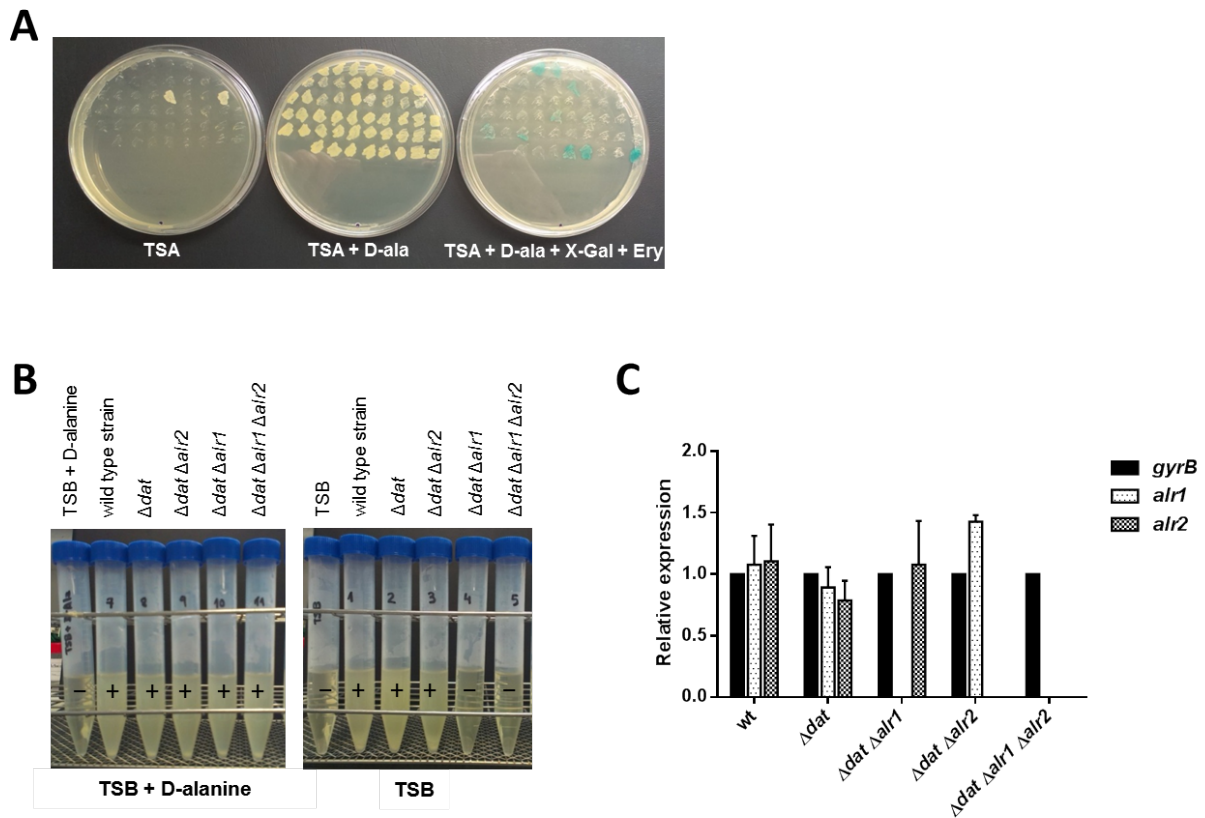

**Figure S2. A. Phenotypic screening of D-alanine auxotrophy during the construction of *S. aureus* 132  $\Delta dat \Delta alr1 \Delta alr2$  triple mutant.** Individual colonies of resolved co-integrants after two successive crossover events were grown on TSA plates supplemented or not with D-alanine (5 mM) and erythromycin (Ery, 10  $\mu$ g/mL). Resolvants with the  $\Delta dat \Delta alr1 \Delta alr2$  genotype are erythromycin-sensitive and grew only on TSA with D-alanine. **B.** Growth of the *S. aureus* 132 wild-type strain and the single, double, and triple isogenic mutants ( $\Delta dat$ ,  $\Delta dat \Delta alr1$ ,  $\Delta dat \Delta alr2$  and  $\Delta dat \Delta alr1 \Delta alr2$ ) in TSB supplemented or not with 5 mM D-alanine, after 24 h of incubation at 37°C with agitation. A plus (+) sign indicates growth and a minus (-) sign indicates no growth. *S. aureus* 132 and 132  $\Delta dat \Delta alr2$  derivative grow normally in TSB with or without D-alanine. However, 132  $\Delta dat \Delta alr1$  and 132  $\Delta dat \Delta alr1 \Delta alr2$  derivatives exhibit normal growth in TSB supplemented with D-alanine, but no visible growth was detected in the absence of this compound. **C.** Relative expression levels of the *alr1* and *alr2* genes from the wild type strain and the isogenic mutants of *S. aureus* 132 analyzed by real-time RT-PCR. The relative expression level is calculated as  $2^{-\Delta CT}$ , where  $\Delta CT$  is the difference between the crossing point target value and the crossing point reference value, normalized to the transcription levels of the housekeeping gene *gyrB*. The target is the strain indicated, whereas the reference is *S. aureus* 132 wild type in all cases. Data are the mean  $\pm$  s.e.m.

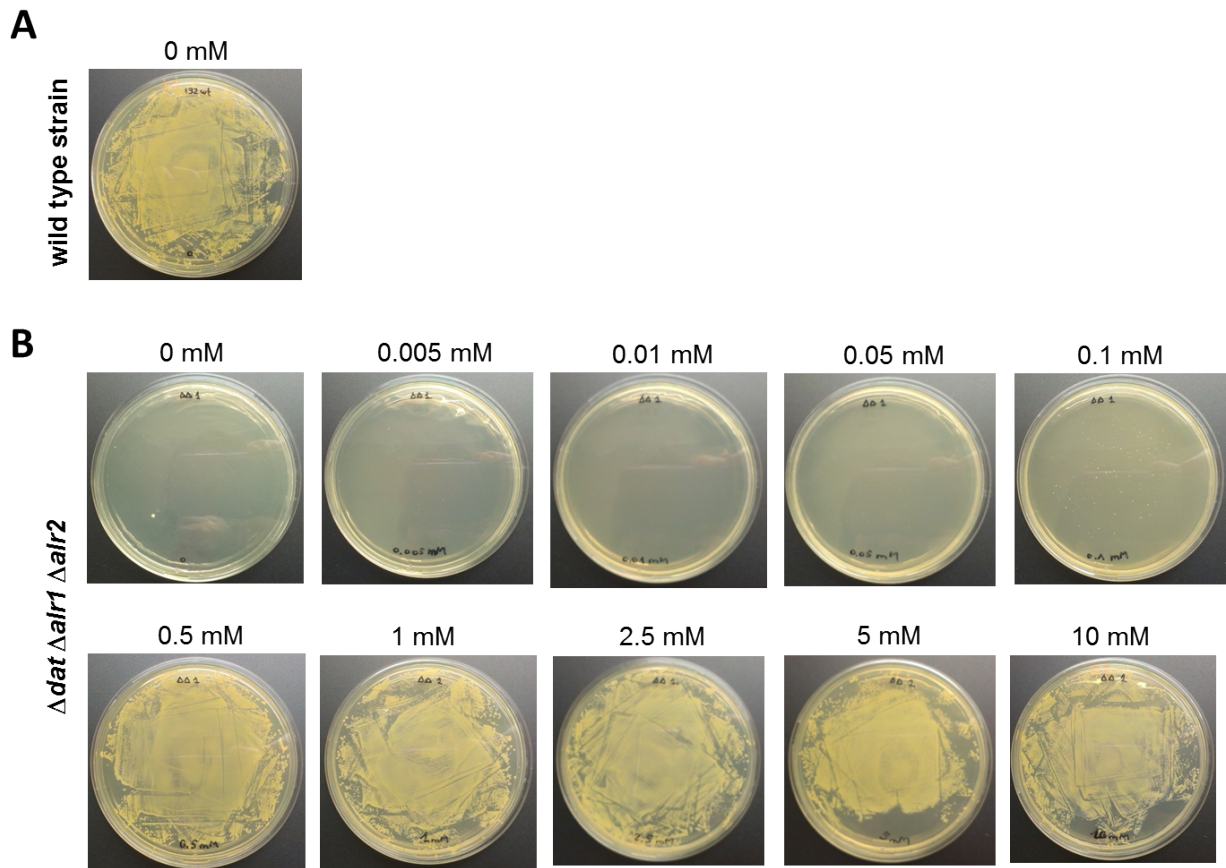

**Figure S3. Determination of D-alanine concentration required for growing *S. aureus* 132  $\Delta dat \Delta alr1 \Delta alr2$ .** Log-phase cultures ( $OD_{600} = 0.2$ ) of the wild type (A) and the triple mutant (B) strains were plated onto TSA without (0 mM) or with D-alanine at different concentrations (from 0.005 mM to 10 mM) as indicated.

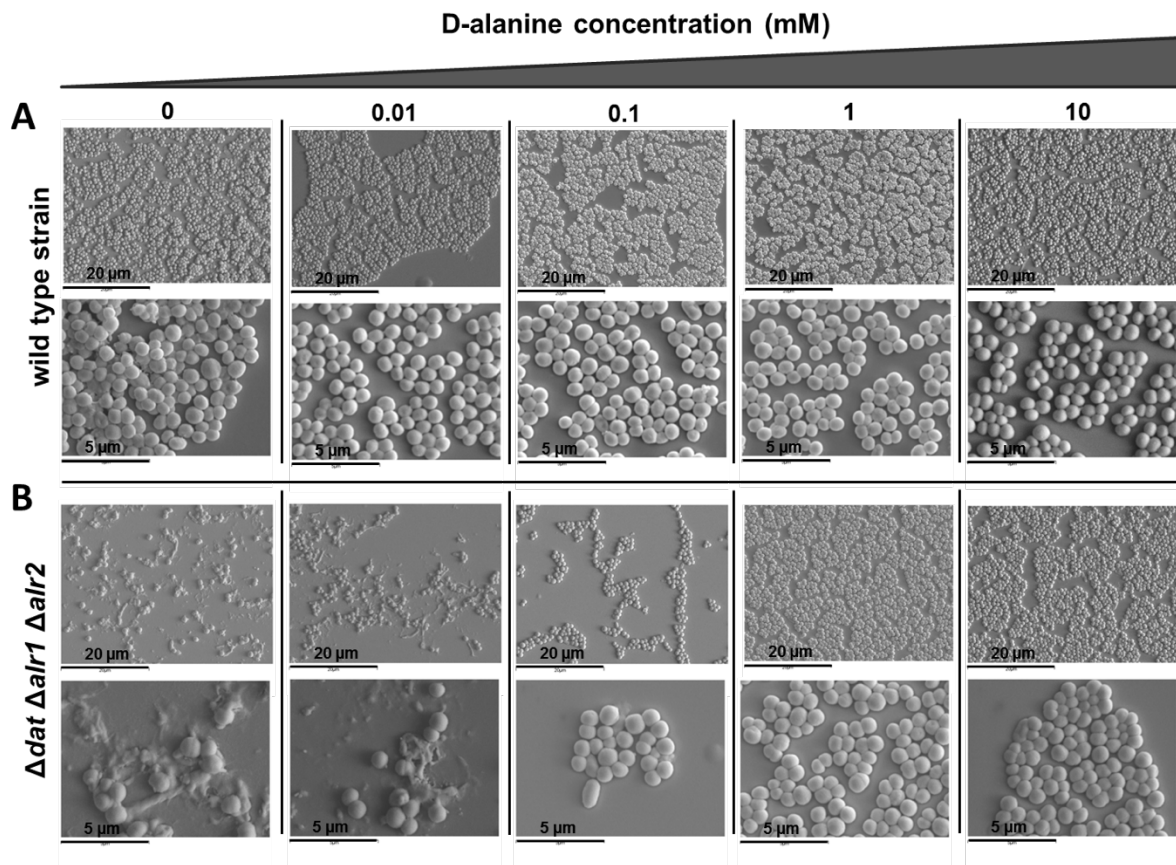

**Figure S4. Morphological changes of *S. aureus* 132  $\Delta dat \Delta alr1 \Delta alr2$  (B) with respect to the wild type strain (A) in the presence of different concentrations of D-alanine (from 0.01 to 10 mM). Images were taken with a scanning electron microscope. Bar indicates a scale of 5  $\mu\text{m}$  or 20  $\mu\text{m}$ .**



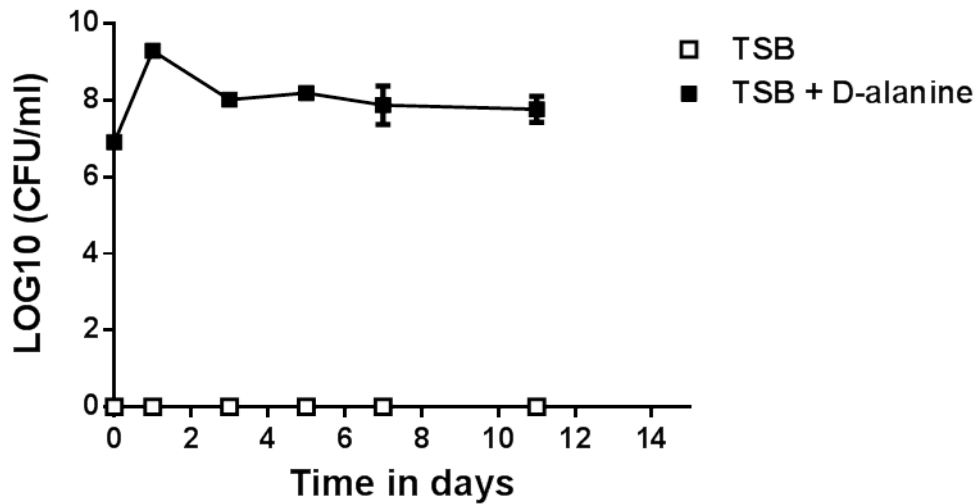

**Figure S5. Evaluation of the phenotypic stability of *S. aureus* 132  $\Delta dat$   $\Delta alr1$   $\Delta alr2$  strain.** Overnight cultures from the auxotroph mutant of *S. aureus* 132 were diluted at an initial  $OD_{600}$  of 0.02 into TSB supplemented with 5 mM D-alanine and incubated at 37°C under agitation (210 rpm) for up to 11 days. Aliquots were removed at different days, and the viable counts ( $\text{Log}_{10}$  CFU per milliliter) on TSA ( $\square$ ) or TSA supplemented with 5 mM D-alanine ( $\blacksquare$ ) were determined. All experiments were performed in triplicate.

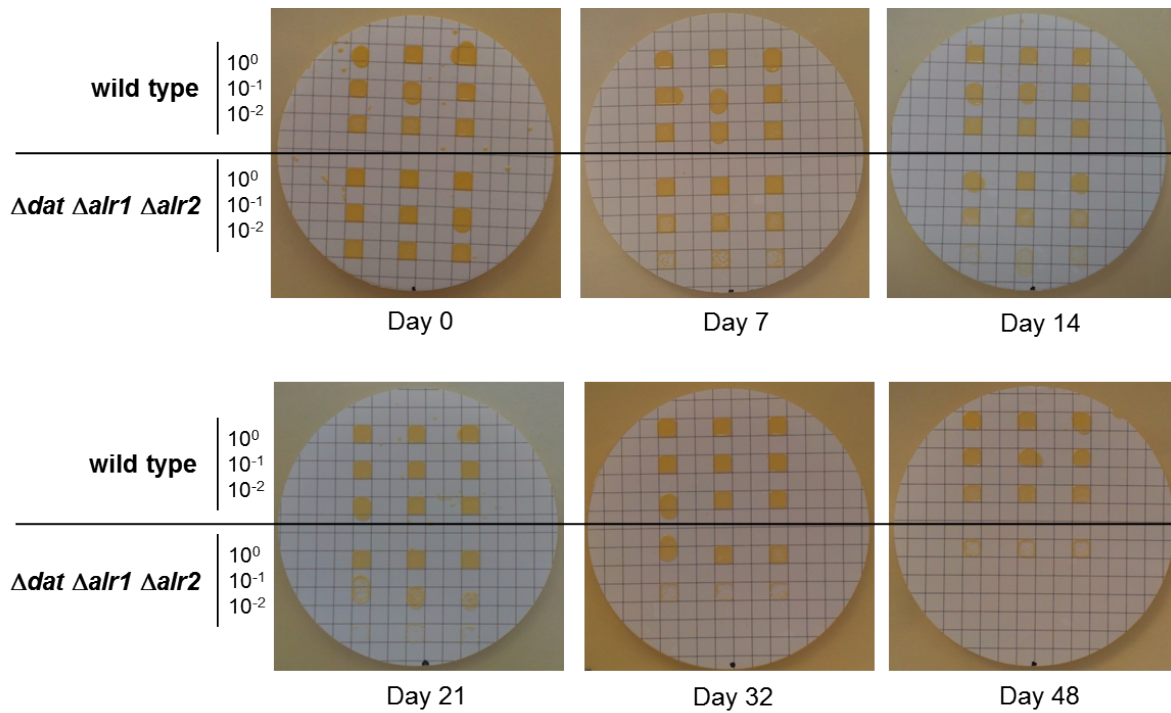

**Figure S6. Survival of D-alanine auxotrophic strain exposed to desiccation conditions.** Cultures of the wild type 132 and 132  $\Delta dat \Delta alr1 \Delta alr2$  strains at log-phase growth were washed and serially diluted in TSB. Drops of 5  $\mu$ L were spotted on sterile membrane filters and maintained at room temperature. Thereafter, the filters were placed immediately (day 0) or after several days (7, 14, 21, 32, and 48 days) onto TSA plates containing 5 mM D-alanine and incubated at 37°C for 18 h. Cultures were performed in triplicate.
